# Supplementary material
Source: PubMed Central journal article supplement (PMC8046337)
Supplement: NIHMS1053163-supplement-AppA.pdf [file NIHMS1053163-supplement-AppA.pdf]

Appendix A. Peer Crowds from Past Research at a Glance.

|                                     |                              | 1960s                                                                                                             | 1970s                                                                                                                               | 1980s                                                                                                                                                                                                                                                                      | 1990s                                                                                                                                                                                                                                                                                                            | 2000s                                                                                                                                                                                 | 2010s                                                                                                                                    |
|-------------------------------------|------------------------------|-------------------------------------------------------------------------------------------------------------------|-------------------------------------------------------------------------------------------------------------------------------------|----------------------------------------------------------------------------------------------------------------------------------------------------------------------------------------------------------------------------------------------------------------------------|------------------------------------------------------------------------------------------------------------------------------------------------------------------------------------------------------------------------------------------------------------------------------------------------------------------|---------------------------------------------------------------------------------------------------------------------------------------------------------------------------------------|------------------------------------------------------------------------------------------------------------------------------------------|
| Conventional groups and individuals | <b>Popularity focus</b>      | Ladies' men <sup>7</sup> , Beauties <sup>7</sup>                                                                  | Snobs <sup>33</sup> , Fun <sup>6</sup> , Elites <sup>19</sup>                                                                       | Populars <sup>3,5</sup> , Mexican-Americans <sup>27</sup>                                                                                                                                                                                                                  | Populars <sup>4,11,18,39,44</sup> , Popular-Nice <sup>11</sup> , Princesses <sup>12</sup> , Prom Queens <sup>15</sup> , In-Crowd <sup>22</sup> , Trendies <sup>22</sup> , Hot Shots <sup>16,38,39</sup> , Socials <sup>41</sup> , Preppies <sup>15,22</sup> , Popular Black <sup>10</sup> , Elites <sup>41</sup> | Populars <sup>24</sup> , Princesses <sup>1,13</sup> , Elites <sup>40</sup> , Preps <sup>43</sup> , Preppies <sup>24</sup> , Hot Shots <sup>24</sup> , Populars/Jocks <sup>23,34</sup> | Elites <sup>30,31,37</sup> , Hot Shots <sup>30</sup> , Preppies <sup>26,30,31</sup> , Socials <sup>30</sup> , Populars <sup>20,31</sup>  |
|                                     | <b>Extracurricular focus</b> | Athletes <sup>7</sup> , Collegiates <sup>36</sup>                                                                 | Pep Crew <sup>33</sup> , Athletes <sup>33</sup> , Jocks/Rah-rahs <sup>25</sup> , Politicos <sup>25</sup> , Music-drama <sup>8</sup> | Jocks <sup>3,5,14</sup> , Athletes <sup>17</sup> , Cheerleaders <sup>17</sup> , Special Interest Crowds <sup>5</sup>                                                                                                                                                       | Jocks <sup>4,11,12,15,16,22,38,39,44</sup> , Preps <sup>42</sup> , Computer-Jocks <sup>22</sup> , Athletes <sup>18</sup>                                                                                                                                                                                         | Jocks <sup>1,13,24,28,29,43</sup> , Athletes <sup>40</sup> , Performers <sup>34</sup>                                                                                                 | Jocks <sup>30,31</sup> , Athletes <sup>30,31,37</sup> , Cheerleaders <sup>30</sup>                                                       |
|                                     | <b>Academic focus</b>        | Brains <sup>7</sup> , Athlete-scholars <sup>7</sup> , Beautiful Brains <sup>7</sup> , Intellectuals <sup>36</sup> | Isolates <sup>19</sup> , Grinds <sup>25</sup> , Intellectuals <sup>25</sup> , Academic <sup>6</sup>                                 | Brains <sup>3,5</sup> , Egg Heads <sup>5</sup> , Brainiacs <sup>17</sup> , Mexican-oriented <sup>27</sup> , Japanese-oriented <sup>27</sup> , Academics <sup>5</sup> , Intelligensia <sup>5</sup> , Smarts <sup>5</sup> , Straight A's <sup>5</sup> , Studios <sup>5</sup> | Brains <sup>4,12,11,39,44</sup> , Egg heads <sup>4</sup> , Intellectuals <sup>4</sup> , Brainiacs <sup>22</sup> , Nerds <sup>22</sup> , Smart <sup>23</sup>                                                                                                                                                      | Brains <sup>1,13,24,32,34,43</sup> , Academics <sup>40</sup>                                                                                                                          | Academics <sup>30,31</sup> , Brains <sup>30,31</sup> , Nerds <sup>30,31,37</sup> , Egg Heads <sup>30</sup> , Goody Goodies <sup>31</sup> |
|                                     | <b>Normals</b>               | Leftovers <sup>7</sup> , Average <sup>36</sup> , Quiet ones <sup>36</sup>                                         | Nobodies <sup>6</sup> , Average <sup>33</sup>                                                                                       | Normals <sup>3,5</sup> , Regulars <sup>3</sup> , Nobodies <sup>3</sup> , Kim <sup>17</sup> , Hybrids <sup>5</sup> , Mexicanos <sup>27</sup>                                                                                                                                | Normals <sup>4,11,15,22,44</sup> , Average <sup>4,11,15,18,42</sup> , Regulars <sup>15,16,22,39</sup> , Ordinaries <sup>15</sup> , In-betweeners <sup>4</sup> , Others <sup>44</sup> , Neglected <sup>18</sup> , Outsiders <sup>10</sup>                                                                         | Average <sup>23,24,43</sup> , Others <sup>40</sup> , None <sup>24</sup> , Invisibles <sup>32</sup> , Ignored <sup>32</sup> , Overlooked <sup>32</sup>                                 | Average <sup>31</sup> , Regulars <sup>31</sup> , Others <sup>30</sup> , Mainstream <sup>20</sup> , Indeterminants <sup>26</sup>          |

\*Some groups may be represented in more than one category due to different conceptions of crowds by study or overlapping crowd membership.

Continued on next page.

Appendix A. Peer Crowds from Past Research at a Glance (continued).

|                                       |                                  | 1960s                     | 1970s                                                                                                                                               | 1980s                                                                                                                                                                                            | 1990s                                                                                                                                                                                                                                                                                                                                                     | 2000s                                                                                                                                                                                                                    | 2010s                                                                                                                                                                                                                                                                 |
|---------------------------------------|----------------------------------|---------------------------|-----------------------------------------------------------------------------------------------------------------------------------------------------|--------------------------------------------------------------------------------------------------------------------------------------------------------------------------------------------------|-----------------------------------------------------------------------------------------------------------------------------------------------------------------------------------------------------------------------------------------------------------------------------------------------------------------------------------------------------------|--------------------------------------------------------------------------------------------------------------------------------------------------------------------------------------------------------------------------|-----------------------------------------------------------------------------------------------------------------------------------------------------------------------------------------------------------------------------------------------------------------------|
| Counterculture groups and individuals | <b>Fringe Media focus</b>        | Hippies <sup>36</sup>     |                                                                                                                                                     |                                                                                                                                                                                                  | Greasers <sup>4</sup> , Skaters <sup>16,22,38</sup> , Head-bangers <sup>22</sup> , Punk Rockers <sup>22</sup> , Heavy Metalers <sup>38,39</sup> , Surfers <sup>39</sup> , Discos-new wave <sup>39</sup> , Geeks <sup>22</sup> , Dorks <sup>22</sup> , Dweebs <sup>22</sup> , Nerds <sup>4,11,15,41</sup> , Radicals <sup>42</sup> , Hippies <sup>38</sup> | Nerds <sup>43</sup> , Freaks <sup>24</sup> , Alternative <sup>23,24,43</sup>                                                                                                                                             | Skaters <sup>30,37</sup> , Hippies <sup>30</sup> , Hipsters <sup>30</sup> , Hip hop <sup>20,26,31</sup> , Alternative <sup>20,21,31</sup> , Counter culture <sup>30</sup> , Goth <sup>31</sup> , Emo <sup>31</sup> , Rockers <sup>31,37</sup> , Country <sup>31</sup> |
|                                       | <b>Illicit risk taking focus</b> | Leathers <sup>36</sup>    | Delinquent <sup>6</sup> , Deviants <sup>19</sup> , Party Girls <sup>33</sup> , Dopers <sup>33</sup> , Freaks <sup>25</sup> , Greasers <sup>25</sup> | Chicanos <sup>27</sup> , Cholos <sup>27</sup> , Burnouts <sup>14</sup> , Druggies <sup>3,5</sup> , Toughs <sup>3,5</sup>                                                                         | Burnouts <sup>4,22,42</sup> , Controversial <sup>18</sup> , Criminals <sup>12</sup> , Druggies <sup>4,11,44</sup> , Toughs <sup>44</sup> , Partiers <sup>11</sup> , Punks <sup>15,38,42</sup> , Freaks <sup>15</sup> , Greasers <sup>4</sup> , "High Risk" <sup>16,38,39</sup> , Dirts <sup>39</sup> , Stoners <sup>38,39</sup> , Bad kids <sup>38</sup>  | Burnouts <sup>23,24,34,43</sup> , Criminals <sup>1,13</sup> , Dirts <sup>24</sup> , Druggies <sup>24</sup> , Deviants <sup>40</sup>                                                                                      | Deviants <sup>30</sup> , Stoners <sup>30</sup> , Druggies <sup>30</sup> , Partiers <sup>30,31</sup> , Gangsters <sup>30</sup> , Cholos <sup>37</sup> , Taggers <sup>37</sup>                                                                                          |
|                                       | <b>Loners</b>                    | Individuals <sup>36</sup> | Outsiders <sup>19</sup>                                                                                                                             | Loners <sup>5</sup> , Outcasts <sup>3,5</sup>                                                                                                                                                    | Loners <sup>4,11,41,44</sup> , Rejected <sup>18</sup> , Basket Cases <sup>12</sup> , Independents <sup>39</sup> , Outsiders <sup>10</sup>                                                                                                                                                                                                                 | Loners <sup>9,32</sup> , Non-conformists <sup>24</sup> , Basket Cases <sup>1,13</sup> , Others <sup>40</sup>                                                                                                             | Misfits <sup>30</sup> , Others <sup>30</sup>                                                                                                                                                                                                                          |
|                                       | <b>Race-ethnic focus</b>         |                           | Blacks <sup>25</sup>                                                                                                                                | Chicanos <sup>27</sup> , Cholos <sup>27</sup> , Mexican-oriented <sup>27</sup> , Japanese-oriented <sup>27</sup> , Mexican-Americans <sup>27</sup> , Mexicanos <sup>27</sup> , Kin <sup>17</sup> | Skinheads <sup>38</sup> , Popular Black <sup>10</sup>                                                                                                                                                                                                                                                                                                     | Whiggers <sup>43</sup> , FOBs <sup>35</sup> , White-washed <sup>35</sup> , Vietnamese <sup>2</sup> , Mexicans <sup>2</sup> , Blacks <sup>2</sup> , Asians <sup>2</sup> , Hispanics <sup>35</sup> , Rappers <sup>35</sup> | Country <sup>20,31</sup> , Hip hop <sup>20,26,31</sup> , Cholos <sup>37</sup>                                                                                                                                                                                         |
| Floaters                              | <b>Floaters</b>                  |                           |                                                                                                                                                     | Floaters <sup>10</sup>                                                                                                                                                                           | Floaters <sup>32</sup>                                                                                                                                                                                                                                                                                                                                    |                                                                                                                                                                                                                          |                                                                                                                                                                                                                                                                       |

\*Some groups may be represented in more than one category due to different conceptions of crowds by study or overlapping crowd membership.

## References

1. Barber, B. L., Eccles, J. S., & Stone, M. R. (2001). Whatever happened to the jock, the brain, and the princess? Young adult pathways linked to adolescent activity involvement and social identity. *Journal of Adolescent Research, 16*(5), 429-455.
2. Brown, B. B., Herman, M., Hamm, J. V., & Heck, D. J. (2008). Ethnicity and image: Correlates of crowd affiliation among ethnic minority youth. *Child Development, 79*(3), 529-546.
3. Brown, B. B., & Lohr, M. J. (1987). Peer-group affiliation and adolescent self-esteem: An integration of ego-identity and symbolic-interaction theories. *Journal of Personality and Social Psychology, 52*(1), 47-55.
4. Brown, B. B., Mounts, N., Lamborn, S. D., & Steinberg, L. (1993). Parenting practices and peer group affiliation in adolescence. *Child Development, 64*(2), 467-482.
5. Clasens, D. R., & Brown, B. B. (1985). The multidimensionality of peer-pressure in adolescence. *Journal of Youth and Adolescence, 14*(6), 451-468.
6. Cohen, J. (1979). High school subcultures and the adult world. *Adolescence, 14*(55), 491-502.
7. Coleman, J. S. (1961). *The adolescent society: The social life of the teenager and its impact on education*. Glencoe, IL: Free Press of Glencoe.
8. Cusick, P. A. (1973). *Inside high school: The student's world*. New York, NY: Hold, Rinehard, and Winston, Inc.
9. Demuth, S. (2004). Understanding the delinquency and social relationships of loners. *Youth & Society, 35*(3), 366-392.
10. Dolcini, M. M., & Adler, N. E. (1994). Perceived competencies, peer group affiliation, and risk behavior among early adolescents. *Health Psychology, 13*(6), 496.
11. Durbin, D. L., Darling, N., Steinberg, L., & Brown, B. B. (1993). Parenting style and peer group membership among European-American adolescents. *Journal of Research on Adolescence, 3*(1), 87-100.
12. Eccles, J. S., & Barber, B. L. (1999). Student council, volunteering, basketball, or marching band: What kind of extracurricular involvement matters? *Journal of Adolescent Research, 14*(1), 10-43.
13. Eccles, J. S., Barber, B. L., Stone, M., & Hunt, J. (2003). Extracurricular activities and adolescent development. *Journal of social issues, 59*(4), 865-889.
14. Eckert, P. (1989). *Jocks and burnouts: Social categories and identity in the high school*. New York, NY: Teachers College Press,
15. Eicher, J. B., Baizerman, S., & Michelman, J. (1991). Adolescent dress. Part II: A qualitative study of suburban high school students. *Adolescence, 26*(103), 679-686.
16. Fishkin, S. A., Sussman, S., Stacy, A. W., Dent, C. W., Burton, D., & Flay, B. R. (1993). Ingroup versus out-group perceptions of the characteristics of high-risk youth: Negative stereotyping. *Journal of Applied Social Psychology, 23*(13), 1051-1958.
17. Fordham, S., & Ogbu, J. U. (1986). Black students' school success: Coping with the "burden of 'acting white'". *The Urban Review, 18*(3), 176-206.
18. Franzoi, S. L., Davis, M. H., & Vasquez-Suson, K. A. (1994). Two social worlds: Social correlates and stability of adolescent status groups. *Journal of Personality and Social Psychology, 67*(3), 462-473.
19. Gottlieb, B. (1975). The contribution of natural support systems to primary prevention among four social subgroups of adolescent males. *Adolescence, 10*(38), 207-219.
20. Jordan, J. W., Stalgaitis, C. A., Charles, J., Madden, P. A., Radhakrishnan, A. G., & Saggese, D. (2018). Peer crowd identification and adolescent health behaviors: results from a statewide representative study. *Health Education & Behavior, 1*-13.
21. Jordan, J. W., Turner, S., & Djakaria, M. (2013). Syke: Using social branding to change culture and reduce teen smoking. *Contemporary issues in social marketing, 195*-215.

22. Kinney, D. A. (1993). From nerds to normals: The recovery of identity among adolescents from middle school to high school. *Sociology of Education*, 66(1), 21-40.
23. La Greca, A. M., & Harrison, H. M. (2005). Adolescent peer relations, friendships, and romantic relationships: Do they predict social anxiety and depression? *Journal of Clinical Child and Adolescent Psychology*, 34(1), 49-61.
24. La Greca, A. M., Prinstein, M. J., & Fetter, M. D. (2001). Adolescent peer crowd affiliation: Linkages with health-risk behaviors and close friendships. *Journal of Pediatric Psychology*, 26(3), 131-143.
25. Larkin, R. (1979). *Suburban Youth in Cultural Crisis*. New York: Oxford University Press.
26. Lee, Y. O., Jordan, J. W., Djakaria, M., & Ling, P. M. (2014). Using peer crowds to segment Black youth for smoking intervention. *Health Promotion Practice*, 15(4), 530-537.
27. Matute-Bianchi, M. E. (1986). Ethnic identities and patterns of school success and failure among Mexican-descent and Japanese-American students in a California high school: An ethnographic analysis. *American Journal of Education*, 95(1), 233-255.
28. Miller, K. E., Farrell, M. P., Barnes, G. M., Melnick, M. J., & Sabo, D. (2005). Gender/Racial differences in jock identity, dating, and adolescent sexual risk. *Journal of Youth and Adolescence*, 34(2), 123-136.
29. Miller, K. E., Hoffman, J. H., Barnes, G. M., Farrell, M. P., Sabo, D., & Melnick, M. J. (2003). Jocks, gender, race, and adolescent. *Journal of Drug Education*, 33(4), 445-462.
30. Moran, M. B., Murphy, S. T., & Sussman, S. (2012). Campaigns and cliques: Variations in effectiveness of an antismoking campaign as a function of adolescent peer group identity. *Journal of Health Communication*, 17(10), 1215-1231.
31. Moran, M. B., Walker, M. W., Alexander, T. N., Jordan, J. W., & Wagner, D. E. (2017). Why peer crowds matter: Incorporating youth subcultures and values in health education campaigns. *American Journal of Public Health*, 107(3), 389-395.
32. Nichols, J. D., & White, J. (2001). Impact of peer networks on achievement of high school algebra students. *The Journal of Educational Research*, 94(5), 267-273.
33. Poveda, T. G., & Crim, D. (1975). Reputation and the adolescent girl: An analysis. *Adolescence*, 10(37), 127-136.
34. Prinstein, M. J., & La Greca, A. M. (2002). Peer crowd affiliation and internalizing distress in childhood and adolescence: A longitudinal follow-back study. *Journal of Research on Adolescence*, 12(3), 325-351.
35. Pyke, K., & Dang, T. (2003). "FOB" and "whitewashed": Identity and internalized racism among second generation Asian Americans. *Qualitative Sociology*, 26(2), 147-172.
36. Riestler, A. E., & Zucker, R. A. (1968). Adolescent social structure and drinking behavior. *Journal of Counseling & Development*, 47(4), 304-312.
37. Schwartz, D., Hopmeyer, A., Luo, T., Ross, A., Fischer, J. (2017). Affiliation with antisocial crowds and psychosocial outcomes in a gang-impacted urban middle school. *Journal of Early Adolescence*, 37(4), 559 - 586.
38. Sussman, S., Dent, C., Simon, T., Stacy, A., Burton, D., & Flay, B. (1993). Identification of which high-risk youth smoke cigarettes regularly. *Health Values*, 17(1), 42-53.
39. Sussman, S., Dent, C., Stacy, A., Burciaga, C., Raynor, A., Turner, G., et al. (1990). Peer group association and adolescent tobacco use. *Journal of Abnormal Psychology*, 99(4), 349-352.
40. Sussman, S., Pokhrel, P., Ashmore, R. D., & Brown, B. B. (2007). Adolescent peer group identification and characteristics: A review of the literature. *Addictive Behaviors*, 32(8), 1602-1627.
41. Tolone, W. L., & Tieman, C. R. (1990). Drugs, delinquency and "nerds": Are loners deviant? *Journal of Drug Education*, 20(2), 153-162.
42. Urberg, K. A. (1992). Locus of peer influence: Social crowd and best friend. *Journal of Youth and Adolescence*, 21(4), 439-450.
43. Urberg, K. A., Değirmencioğlu, S. M., Tolson, J. M., & Halliday-Scher, K. (2000). Adolescent social crowds: Measurement and relationship

to friendships. *Journal of Adolescent Research*, 15(4), 427-445.

44. Younis, J., McLellan, J., & Strouse, (1994). We're popular, but we're not Snobs": Adolescents Describe Their Crowds. In R. Montemayor, G. R. Adams, & T. P. Gullotta (Eds.), *Personal relationships during adolescence* (pp. 101–12). Thousand Oaks, CA: Sage.
